# Supplementary material for: Seismic anisotropy inferred from direct S-waves derived splittingmeasurements and its geodynamic implications beneathsoutheastern Tibetan Plateau
Source: Copernicus journal article supplement (doi:10.5194/se-2016-134), 2016-09-20
Supplement: Supplementary file [file se-2016-134-AC1-supplement.zip]

**Table 1.** List of the earthquakes used in this study.

| event date | event time | latitude(°) | longitude(°) | depth(m) | magnitude | location site            | event id |
|------------|------------|-------------|--------------|----------|-----------|--------------------------|----------|
| 2003/10/04 | 14:49:02.7 | -07.05      | +125.41      | 532.7    | 5.5       | BANDA SEA                | B100403C |
| 2003/10/17 | 17:19:53.6 | -05.08      | +102.46      | 35.1     | 5.6       | SOUTHERN SUMATRA, INDONE | B101703D |
| 2003/11/09 | 19:23:28.6 | +01.56      | +127.36      | 133.9    | 5.8       | HALMAHERA, INDONESIA     | B110903E |
| 2004/02/08 | 08:58:51.8 | -03.66      | +135.34      | 25.7     | 5.7       | IRIAN JAYA REGION, INDON | C020804C |
| 2004/02/20 | 05:58:45.2 | -11.61      | +166.45      | 84.0     | 5.6       | SANTA CRUZ ISLANDS       | C022004A |
| 2004/03/17 | 05:21:00.8 | +34.59      | +023.33      | 24.5     | 5.9       | CRETE, GREECE            | C031704C |
| 2004/03/26 | 15:20:06.6 | +41.86      | +144.21      | 22.4     | 5.7       | HOKKAIDO, JAPAN REGION   | C032604D |
| 2004/04/09 | 15:23:35.0 | -13.17      | +167.20      | 228.4    | 5.8       | VANUATU ISLANDS          | C040904B |
| 2004/05/28 | 12:38:44.3 | +36.25      | +051.62      | 17.0     | 6.2       | NORTHERN AND CENTRAL IRA | C052804A |
| 2004/06/22 | 09:04:43.9 | -10.90      | +166.26      | 152.8    | 5.8       | SANTA CRUZ ISLANDS       | C062204E |
| 2004/06/30 | 23:37:25.5 | +00.80      | +124.73      | 90.8     | 6.0       | MINAHASSA PENINSULA, SUL | C063004F |
| 2004/07/08 | 10:30:49.2 | +47.20      | +151.30      | 128.5    | 5.9       | KURIL ISLANDS            | C070804A |
| 2004/07/25 | 14:35:19.1 | -02.43      | +103.98      | 582.1    | 6.8       | SOUTHERN SUMATRA, INDONE | C072504B |
| 2003/07/27 | 06:25:32.0 | +47.15      | +139.25      | 470.3    | 6.3       | PRIMOR'YE, RUSSIA        | C072703C |
| 2004/08/02 | 02:36:54.9 | -05.47      | +102.62      | 40.5     | 5.5       | SOUTHERN SUMATRA, INDONE | C080204B |
| 2004/08/07 | 14:18:35.2 | -06.24      | +095.67      | 20.7     | 5.8       | SOUTHWEST OF SUMATRA, IN | C080704D |
| 2004/08/28 | 17:00:58.2 | -08.69      | +157.25      | 10.0     | 5.5       | SOLOMON ISLANDS          | C082804F |
| 2003/08/31 | 23:08:00.3 | +43.39      | +132.27      | 481.1    | 5.5       | PRIMOR'YE, RUSSIA        | C083103C |
| 2003/09/11 | 21:58:25.5 | -08.20      | +156.16      | 10.0     | 5.5       | SOLOMON ISLANDS          | C091103C |
| 2004/09/15 | 19:10:50.6 | +14.22      | +120.41      | 115.4    | 6.0       | LUZON, PHILIPPINES       | C091504D |
| 2003/10/11 | 00:08:49.1 | +41.92      | +144.36      | 33.0     | 5.9       | HOKKAIDO, JAPAN REGION   | C101103A |
| 2003/10/11 | 01:11:31.2 | +43.97      | +148.21      | 51.2     | 6.2       | EAST OF KURIL ISLANDS    | C101103C |
| 2003/10/17 | 10:19:06.8 | -05.47      | +154.15      | 133.0    | 6.2       | SOLOMON ISLANDS          | C101703B |
| 2003/10/22 | 11:45:30.8 | -06.06      | +147.73      | 53.5     | 6.2       | EASTERN NEW GUINEA REG., | C102203C |
| 2003/11/12 | 08:26:43.7 | +33.17      | +137.07      | 384.9    | 6.1       | NEAR S. COAST OF HONSHU, | C111203E |
