# Supplementary material for: Seismic anisotropy inferred from direct S-waves derived splittingmeasurements and its geodynamic implications beneathsoutheastern Tibetan Plateau
Source: Copernicus journal article supplement (doi:10.5194/se-2016-134), 2016-09-20
Supplement: Supplementary file [file se-2016-134-AC1-supplement.zip]

**Fig. 1:** Example of the direct S-waves measurement at a target station ES33 with 20 (left) and 40 samples per second (right) for a station pair ES12 (reference station) - ES33 (target station).

**Fig. 2:** Plot of splitting parameters ( $\phi$  and  $\delta t$ ) as a function of inter-station spacing of the target and reference station for a particular event C101703B, CMT ID (-05.47°, +154.15°) which recorded at target stations ES04, ES34, ES36, ES38 and ES39 and their corresponding reference stations. We have used different symbols for these target stations.

**Fig. 3.** Lateral variation of station-averaged S-derived splitting parameters (left) resultant average splitting parameters when all events within an epicentral distance range of 30°-90° are in use (right) resultant average splitting parameters when a subset of event database within an epicentral distances range of 50°.-90°.

**Fig 4.** Scatter plot of station averaged splitting parameters (FPDs and TDs) inferred from both synthetic S and SKS phases. (top) apparent splitting results inferred from N-S and E-W horizontal components. (b) The same inferred from decomposed SV and SH horizontal components.

**Fig. 5.** Variation of split time delays with hypocentral depths of the events in this study.
