# Supplementary material for: Seismic anisotropy inferred from direct S-waves derived splittingmeasurements and its geodynamic implications beneathsoutheastern Tibetan Plateau
Source: Copernicus journal article supplement (doi:10.5194/se-2016-134), 2016-09-20
Supplement: Supplementary file [file se-2016-134-AC1-supplement.zip]

**Table 2.** Obtained average splitting parameter ( $\phi_s$  and  $\delta t_s$ ) estimated from direct-S wave splitting measurement.

| stations | latitude(°) | longitude(°) | $\phi_s$ (°) | $\delta t_s$ (sec) | number of event at a station | contributing reference stations         |
|----------|-------------|--------------|--------------|--------------------|------------------------------|-----------------------------------------|
| ES01     | 31.26       | 92.09        | 73.9         | 1.5                | 31                           | 2,3,4,5,7,8,9,10,11,12,36,38,39,40,41   |
| ES02     | 31.00       | 92.54        | 75.7         | 1.5                | 26                           | 1,3,4,5,7,8,9,10,11,12,13,38,40,41      |
| ES03     | 30.75       | 92.86        | 81.7         | 1.2                | 16                           | 2, 4,5,7,8,10,11,12,38,39,43            |
| ES04     | 30.65       | 93.25        | 91.5         | 1.2                | 11                           | 1,3,5,7,8,10,11,12                      |
| ES05     | 31.68       | 92.40        | 71.2         | 1.1                | 14                           | 1,2,3,4,7,8,10,11,12,13                 |
| ES07     | 31.48       | 93.70        | 93.8         | 1.0                | 15                           | 1,2,3,4,5,8,9,10,11,12,14,38            |
| ES08     | 31.28       | 93.84        | 106.3        | 0.9                | 12                           | 1,2,4,5,7,10,11,12,13                   |
| ES09     | 31.91       | 93.06        | 81.5         | 1.1                | 15                           | 1,3,5,8,10,11,12,13,14                  |
| ES10     | 31.84       | 93.79        | 103.1        | 1.0                | 19                           | 1,2,3,4,5,7,8,9,11,12,14,38             |
| ES11     | 31.91       | 94.14        | 96.2         | 1.2                | 25                           | 1,2,3,4,5,7,8,9,10,12,14,36,38          |
| ES12     | 31.59       | 94.71        | 101.3        | 1.2                | 28                           | 1,2,3,4,5,7,8,9,10,11,13,14,15,23,25,38 |
| ES13     | 31.54       | 95.28        | 88.5         | 1.4                | 15                           | 2,4,9,11,12,13,14,15,26,30,36,38        |
| ES14     | 31.25       | 95.90        | 102.9        | 1.2                | 24                           | 3,4,7,9,10,11,12,13,15,17,23,25,31      |
| ES15     | 31.19       | 96.50        | 104.2        | 1.0                | 09                           | 11,12,14,16,25,36,38                    |
| ES16     | 31.18       | 97.02        | 117.0        | 1.4                | 01                           | 13                                      |
| ES17     | 31.27       | 97.55        | 135.4        | 1.0                | 11                           | 18,23,25,31                             |
| ES18     | 31.30       | 97.96        | 122.0        | 0.8                | 02                           | 17                                      |
| ES19     | 30.81       | 95.71        | 106.6        | 1.5                | 09                           | 3,4,7,8,11,12,38                        |
| ES20     | 30.73       | 96.10        | 108.0        | 0.9                | 01                           | 11                                      |
| ES22     | 30.81       | 96.70        | 110.0        | 0.9                | 01                           | 14                                      |
| ES23     | 30.69       | 97.26        | 96.2         | 1.0                | 16                           | 12,15,25,31                             |
| ES24     | 30.50       | 97.14        | 106.0        | 1.1                | 03                           | 13, 15                                  |
| ES25     | 30.12       | 97.30        | 121.1        | 0.9                | 10                           | 18,23,31                                |
| ES26     | 29.96       | 97.51        | 142.2        | 1.0                | 03                           | 14,30,31                                |
| ES27     | 29.64       | 97.90        | 130.0        | 1.1                | 01                           | 26                                      |
| ES29     | 30.01       | 96.69        | 84.0         | 1.1                | 16                           | 14,15,23,25,31                          |
| ES30     | 29.32       | 97.19        | 110.8        | 1.1                | 07                           | 25,26,27,31                             |
| ES31     | 29.51       | 96.76        | 82.4         | 1.2                | 16                           | 14,17,25,26,30,31                       |
| ES32     | 29.76       | 96.10        | 103.0        | 1.4                | 02                           | 13,30                                   |
| ES33     | 29.77       | 95.70        | 67.1         | 0.6                | 10                           | 3,7,11,12,14,15,30,38                   |
| ES34     | 29.91       | 95.47        | 84.8         | 1.2                | 20                           | 3,4,7,8,10,11,12,14,15,16,36,38         |
| ES35     | 29.96       | 94.78        | 111.9        | 1.1                | 09                           | 1,4,10,14,15,16,31,36,38                |
| ES36     | 29.81       | 93.91        | 86.2         | 1.1                | 13                           | 1,4,5,7,8,11,13,14,15,38,40,41          |
| ES37     | 29.90       | 93.51        | 80.5         | 1.4                | 07                           | 1,10,13,36,39,40,41                     |
| ES38     | 30.02       | 92.97        | 72.5         | 1.2                | 18                           | 3,4,5,7,8,10,11,12,36,39,40,41          |
| ES39     | 29.87       | 92.62        | 75.8         | 1.6                | 17                           | 1,2,3,4,8,9,10,11,36,38,40,41           |
| ES40     | 29.71       | 92.15        | 78.0         | 1.4                | 14                           | 1,2,4,5,7,8,10,36,38,39,41,43           |
| ES41     | 29.19       | 91.76        | 70.4         | 1.7                | 14                           | 2,3,4,5,36,38,40                        |
| ES42     | 28.90       | 91.94        | 108.6        | 1.6                | 06                           | 1,37,39                                 |
| ES43     | 29.04       | 92.23        | 75.4         | 1.2                | 05                           | 8,36,38,39                              |
| ES45     | 29.12       | 93.78        | 65.8         | 1.3                | 05                           | 7,8,38                                  |
| ES46     | 29.25       | 94.26        | 89.2         | 1.1                | 04                           | 10,36                                   |
